# Supplementary material
Source: PubMed Central journal article supplement (PMC5332377)
Supplement: NIHMS816254-supplement-Supplemental_Table.pdf [file NIHMS816254-supplement-Supplemental_Table.pdf]

Supplemental Table 1: Family Experience of Applied Behavior Analysis (ABA)

| Family | Children with Autism (age at recruitment)                | Parents                                                     | Other Children (age)                                                    | Parents' Actions Regarding ABA                                                                                                                                     | Family Experiences with ABA                                                                                                                                                                                                                                                                                                            | Occupational Diagnosis of Complex Situation                                                                                                                                              |
|--------|----------------------------------------------------------|-------------------------------------------------------------|-------------------------------------------------------------------------|--------------------------------------------------------------------------------------------------------------------------------------------------------------------|----------------------------------------------------------------------------------------------------------------------------------------------------------------------------------------------------------------------------------------------------------------------------------------------------------------------------------------|------------------------------------------------------------------------------------------------------------------------------------------------------------------------------------------|
| 1      | Mateo Jr. (4 yrs, 11 mos)<br><br>Isabella (3 yrs, 9 mos) | Fabiana (Mother),<br>Mateo Sr. (Father)                     | Melanie (1 yr, 11 mos)                                                  | <ul style="list-style-type: none"> <li>• Mother declined ABA evaluations for both children</li> </ul>                                                              | <ul style="list-style-type: none"> <li>• Mother said ABA:                             <ul style="list-style-type: none"> <li>○ would be beneficial for children</li> <li>○ but would be a “really intense” commitment for self</li> <li>○ would require difficult “adjustment” period for children</li> </ul> </li> </ul>              | <ul style="list-style-type: none"> <li>• Occupational losses (family) outweighed occupational benefits (children)</li> </ul>                                                             |
|        |                                                          |                                                             |                                                                         |                                                                                                                                                                    | <ul style="list-style-type: none"> <li>• Mother was tired, needed a break, and was not ready to have therapists in her home regularly</li> <li>• Mother wanted the children to have unstructured time after school</li> <li>• (Father’s experiences unknown)</li> </ul>                                                                | <ul style="list-style-type: none"> <li>• Orchestration challenges</li> <li>• Occupational imbalance (Mother and children)</li> </ul>                                                     |
| 2      | Rafael Jr. (6 yrs, 7 mos)                                | Nicole (Mother),<br>Rafael Sr. (Father)                     | Andrew (10 mos)<br><br>(Family expecting another baby when study ended) | <ul style="list-style-type: none"> <li>• Parents accepted ABA</li> <li>• Parents frequently cancelled ABA because Rafael Jr. cried during most sessions</li> </ul> | <ul style="list-style-type: none"> <li>• Parents said ABA:                             <ul style="list-style-type: none"> <li>○ was beneficial for Rafael Jr.</li> <li>○ but did not like that it “triggered” him, resulting in tears and “bad” sessions where he “score[d] low”</li> </ul> </li> </ul>                                | <ul style="list-style-type: none"> <li>• Positive and negative occupational outcomes (child)</li> <li>• Occupational losses (family) outweighed occupational benefits (child)</li> </ul> |
|        |                                                          |                                                             |                                                                         | <ul style="list-style-type: none"> <li>• Mother stopped ABA</li> </ul>                                                                                             | <ul style="list-style-type: none"> <li>• When the new baby was born, Mother wanted the flexibility to take a break or to cancel sessions when the family was not getting enough sleep</li> <li>• ABA supervisors told Mother she should not cancel more sessions, so she was “done with them”</li> </ul>                               | <ul style="list-style-type: none"> <li>• Orchestration challenges</li> <li>• Occupational imbalance (family)</li> </ul>                                                                  |
|        |                                                          |                                                             |                                                                         | <ul style="list-style-type: none"> <li>• Mother considered re-starting ABA</li> </ul>                                                                              | <ul style="list-style-type: none"> <li>• A year later, Mother was considering a different ABA company but was apprehensive because she:                             <ul style="list-style-type: none"> <li>○ valued Rafael Jr. having unstructured time after school</li> <li>○ did not want him to cry anymore</li> </ul> </li> </ul> | <ul style="list-style-type: none"> <li>• Occupational imbalance (child)</li> <li>• Negative occupational outcomes (child)</li> </ul>                                                     |
| 3      | Gabriela (3 yrs, 4 mos)                                  | Sarah (Mother)<br><br>(David, Sarah’s boyfriend, considered | Camila (6 yrs)                                                          | <ul style="list-style-type: none"> <li>• Mother accepted ABA</li> </ul>                                                                                            | <ul style="list-style-type: none"> <li>• Mother did not see results (Gabriela behaved well during sessions)</li> </ul>                                                                                                                                                                                                                 | <ul style="list-style-type: none"> <li>• No evidence of amelioration of occupational challenges (child)</li> </ul>                                                                       |
|        |                                                          |                                                             |                                                                         |                                                                                                                                                                    | <ul style="list-style-type: none"> <li>• Mother said requirement to be present for all sessions was “too much” as she balanced work, school, and caring for both children</li> </ul>                                                                                                                                                   | <ul style="list-style-type: none"> <li>• Orchestration challenges</li> </ul>                                                                                                             |

| Family | Children with Autism (age at recruitment) | Parents                         | Other Children (age)         | Parents' Actions Regarding ABA                                                                                                                                    | Family Experiences with ABA                                                                                                                                                                                                                                                                                                          | Occupational Diagnosis of Complex Situation                                                                                                                                                                                                           |
|--------|-------------------------------------------|---------------------------------|------------------------------|-------------------------------------------------------------------------------------------------------------------------------------------------------------------|--------------------------------------------------------------------------------------------------------------------------------------------------------------------------------------------------------------------------------------------------------------------------------------------------------------------------------------|-------------------------------------------------------------------------------------------------------------------------------------------------------------------------------------------------------------------------------------------------------|
|        |                                           | a "father figure")              |                              |                                                                                                                                                                   | <ul style="list-style-type: none"> <li>Camila said Mother did not have enough time for her</li> </ul>                                                                                                                                                                                                                                | <ul style="list-style-type: none"> <li>Occupational imbalance (Mother and sister)</li> </ul>                                                                                                                                                          |
|        |                                           |                                 |                              | <ul style="list-style-type: none"> <li>Mother stopped ABA</li> </ul>                                                                                              | <ul style="list-style-type: none"> <li>After a few weeks, Mother determined benefits did not outweigh costs</li> </ul>                                                                                                                                                                                                               | <ul style="list-style-type: none"> <li>Occupational losses (family) outweighed occupational benefits (child)</li> </ul>                                                                                                                               |
| 4      | Danny (5 yrs, 8 mos)                      | Sofia (Mother), Daniel (Father) | Half-sister Abigail (17 yrs) | <ul style="list-style-type: none"> <li>Parents accepted ABA</li> <li>Parents delayed starting other therapies because of the initial difficulty of ABA</li> </ul> | <ul style="list-style-type: none"> <li>Father expressed concern that 15 hours of therapies/week did not leave Danny time to "be a kid"</li> <li>Parents found ABA sessions "difficult to watch" because Danny cried for hours</li> <li>Daniel questioned whether it was making Danny's behavior "worse"</li> </ul>                   | <ul style="list-style-type: none"> <li>Orchestration challenges</li> <li>Occupational imbalance (Father and child)</li> <li>Negative occupational outcomes (child)</li> <li>No evidence of amelioration of occupational challenges (child)</li> </ul> |
|        |                                           |                                 |                              | <ul style="list-style-type: none"> <li>Parents committed to continuing ABA</li> </ul>                                                                             | <ul style="list-style-type: none"> <li>Parents became 'bought into' ABA after seeing results (e.g., Danny pointing to make a choice between two objects)</li> </ul>                                                                                                                                                                  | <ul style="list-style-type: none"> <li>Positive occupational outcomes (child)</li> </ul>                                                                                                                                                              |
|        |                                           |                                 |                              | <ul style="list-style-type: none"> <li>Parents objected to ABA approach</li> </ul>                                                                                | <ul style="list-style-type: none"> <li>Parents said that rigid ABA strategies were: <ul style="list-style-type: none"> <li>no longer working</li> <li>not drawing upon Danny's cognitive strengths</li> <li>frustrating him</li> </ul> </li> <li>Parents said this approach was misaligned with their "family philosophy"</li> </ul> | <ul style="list-style-type: none"> <li>No evidence of amelioration of occupational challenges (child)</li> <li>Negative occupational outcomes (child)</li> <li>Mismatch with occupational style (ABA approach with family)</li> </ul>                 |
|        |                                           |                                 |                              | <ul style="list-style-type: none"> <li>Parents "shaped" ABA for Danny</li> </ul>                                                                                  | <ul style="list-style-type: none"> <li>Parents insisted that therapists use a "naturalistic" approach (i.e., through naturally-occurring family activities) that drew upon Danny's strengths</li> </ul>                                                                                                                              | <ul style="list-style-type: none"> <li>Congruence with occupational style (ABA approach and family)</li> <li>Positive occupational outcomes (child)</li> </ul>                                                                                        |

| Family | Children with Autism (age at recruitment) | Parents         | Other Children (age) | Parents' Actions Regarding ABA                                                                                                          | Family Experiences with ABA                                                                                                                                                                                                                                                                                                                                                                                                                         | Occupational Diagnosis of Complex Situation                                                                                                                                                                                           |
|--------|-------------------------------------------|-----------------|----------------------|-----------------------------------------------------------------------------------------------------------------------------------------|-----------------------------------------------------------------------------------------------------------------------------------------------------------------------------------------------------------------------------------------------------------------------------------------------------------------------------------------------------------------------------------------------------------------------------------------------------|---------------------------------------------------------------------------------------------------------------------------------------------------------------------------------------------------------------------------------------|
| 5      | Jayden (5 years, 5 months)                | Sabine and Kyle | None                 | <ul style="list-style-type: none"> <li>Parents accepted ABA</li> <li>Parents committed to continuing ABA</li> </ul>                     | <ul style="list-style-type: none"> <li>Parents said their first ABA therapist was “phenomenal” and “reached” Jayden because her manner of engaging him was similar to Parents’ engagement style (e.g., energetic; treat all his behaviors as intentional and communicative)</li> </ul>                                                                                                                                                              | <ul style="list-style-type: none"> <li>Congruence with occupational style (therapist with family)</li> </ul>                                                                                                                          |
|        |                                           |                 |                      | <ul style="list-style-type: none"> <li>Father objected to ABA approach</li> </ul>                                                       | <ul style="list-style-type: none"> <li>Jayden got a new therapist and supervisor; Parents believed that Jayden “regressed” because of the change (increased aggressive and self-injurious behaviors, tantrums)</li> <li>Father said new supervisor’s interpretation of and response to Jayden’s tantrum behaviors was <ul style="list-style-type: none"> <li>ineffective</li> <li>not in line with Parents’ engagement style</li> </ul> </li> </ul> | <ul style="list-style-type: none"> <li>Negative occupational outcomes (child)</li> <li>No evidence of amelioration of occupational challenges (child)</li> <li>Mismatch with occupational style (ABA approach with family)</li> </ul> |
|        |                                           |                 |                      | <ul style="list-style-type: none"> <li>Father shaped ABA for Jayden</li> </ul>                                                          | <ul style="list-style-type: none"> <li>Father insisted that supervisor and therapist alter treatment plan (e.g., do not ignore all tantrums)</li> <li>Later, their new therapist was better aligned with Parents’ style: <ul style="list-style-type: none"> <li>improvement in tantrum behaviors</li> <li>Parents happy with ABA</li> </ul> </li> </ul>                                                                                             | <ul style="list-style-type: none"> <li>Congruence with occupational style (ABA approach and therapist with family)</li> <li>Evidence of amelioration of occupational challenges (child)</li> </ul>                                    |
| 6      | Olivia (3 yrs, 7 mos)                     | Miriam and Dan  | Zack (6 yrs)         | <ul style="list-style-type: none"> <li>Parents accepted ABA</li> </ul>                                                                  | <ul style="list-style-type: none"> <li>Parents were happy with ABA because they: <ul style="list-style-type: none"> <li>saw progress</li> <li>had a close relationship with the therapist</li> </ul> </li> <li>Mother made it her “mission” to keep the same therapist when funding switched from regional center to private health insurance</li> </ul>                                                                                            | <ul style="list-style-type: none"> <li>Positive occupational outcomes (child)</li> <li>Congruence of occupational style (therapist with family)</li> </ul>                                                                            |
|        |                                           |                 |                      | <ul style="list-style-type: none"> <li>ABA stopped when family moved to another town</li> <li>9 months later, Family started</li> </ul> | <ul style="list-style-type: none"> <li>Parents’ experiences with new ABA program unknown (end of study)</li> </ul>                                                                                                                                                                                                                                                                                                                                  |                                                                                                                                                                                                                                       |

| Family | Children with Autism (age at recruitment) | Parents | Other Children (age) | Parents' Actions Regarding ABA | Family Experiences with ABA | Occupational Diagnosis of Complex Situation |
|--------|-------------------------------------------|---------|----------------------|--------------------------------|-----------------------------|---------------------------------------------|
|        |                                           |         |                      | with new company               |                             |                                             |
